# Supplementary material for: Elevated collagen-I augments tumor progressive signals, intravasation and metastasis of prolactin-induced estrogen receptor alpha positive mammary tumor cells
Source: Springer Nature journal article supplement (doi:10.1186/s13058-017-0801-1), 2017-01-19
Supplement: MOESM3 [file 12008426]

## Barcus et al., Additional File 3

### Additional File 3: Conditions for immunohistochemistry and immunofluorescence antibodies

| <b>Immunohistochemical Antigen/Antibody Conditions</b> |                          |                 |                               |
|--------------------------------------------------------|--------------------------|-----------------|-------------------------------|
| <b>Antibody</b>                                        | <b>Antigen Retrieval</b> | <b>Blocking</b> | <b>Antibody Concentration</b> |
| ER $\alpha$                                            | Citrate pH 6.0           | 5% goat serum   | 1:500                         |
| Progesterone Receptor                                  | Citrate pH 6.0           | 5% goat serum   | 1:500                         |
| pERK1/2                                                | Citrate pH 6.0           | 5% goat serum   | 1:400                         |
| pSTAT5                                                 | Citrate pH 6.0           | 5% goat serum   | 1:100                         |
| pAKT S473                                              | Citrate pH 6.0           | 5% goat serum   | 1:50                          |
| Biotinylated-GFP                                       | Citrate pH 6.0           | 5% goat serum   | 1:70                          |
