# Supplementary material for: Elevated collagen-I augments tumor progressive signals, intravasation and metastasis of prolactin-induced estrogen receptor alpha positive mammary tumor cells
Source: Springer Nature journal article supplement (doi:10.1186/s13058-017-0801-1), 2017-01-19

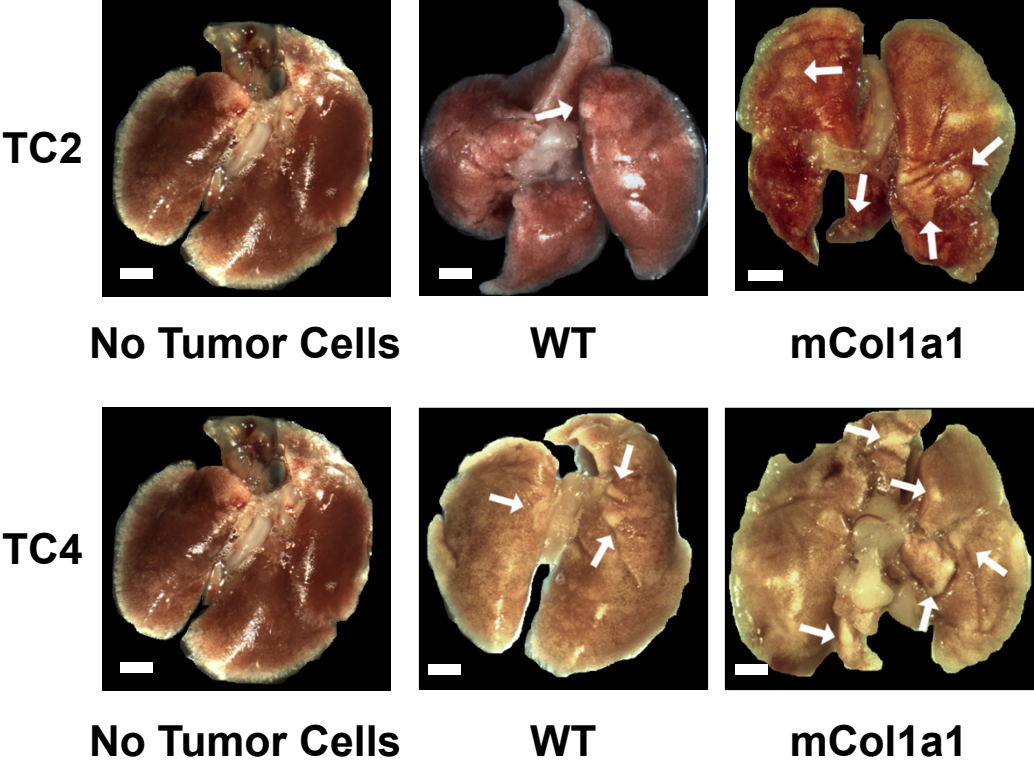

Supplement: MOESM5 [file 12008426]
